# Supplementary material for: Correlates of Healthy Aging in Geriatric HIV (CHANGE HIV)—CTN 314
Source: MDPI journal article supplement (doi:10.3390/v15020517), 2023-02-13
Supplement: s1 [file s1]

**Supplementary tables:**

**Table S1.** Domains of health measured in the CHANGE HIV cohort.

| <b>Domain of health</b> | <b>Measure</b>                                                                                                             | <b>Measurement tools</b>                                                                                                                                                                                                                                                                                                                                                                                                                   |
|-------------------------|----------------------------------------------------------------------------------------------------------------------------|--------------------------------------------------------------------------------------------------------------------------------------------------------------------------------------------------------------------------------------------------------------------------------------------------------------------------------------------------------------------------------------------------------------------------------------------|
| Physical function       | Frailty<br><br>Disability<br>Independence<br><br>Falls<br>Urinary incontinence<br>Insomnia<br>Vision<br>Hearing<br>Fatigue | Fried frailty phenotype [6]<br>Frailty Index [7]<br>HIV Disability Questionnaire [8]<br>Basic Activities of Daily Living [9]<br>Instrumental Activities of Daily Living [10]<br>ACTG 5322 falls questionnaire [11]<br>Bladder diary [12]<br>Pittsburg sleep quality index [13]<br>Snellen vision chart [14]<br>Hearing handicap inventory for the elderly [15]<br>Functional Assessment of Chronic Illness<br>Treatment fatigue scale [16] |
| Mental health           | Anxiety<br>Depression                                                                                                      | Hamilton Anxiety Rating Scale [17]<br>Beck Depression Scale [18]<br>Geriatric Depression Scale [19]<br>Center for Epidemiologic Studies Depression Score [20, 21]                                                                                                                                                                                                                                                                          |
| Cognitive function      | Learning, judgement, memory                                                                                                | Mini Mental Status Evaluation [22]<br>Montreal Cognitive Assessment (MoCA) [23]                                                                                                                                                                                                                                                                                                                                                            |
| Quality of life         | Well being<br>Satisfaction                                                                                                 | Life satisfaction questionnaire [24]<br>EQ5D [25]<br>MOS HIV [26]                                                                                                                                                                                                                                                                                                                                                                          |
| Social supports         | Social support networks<br>Loneliness                                                                                      | Duke social support index [27]<br>Medical outcome study social support survey [28]<br>UCLA Loneliness Scale [29]                                                                                                                                                                                                                                                                                                                           |
| Pain                    | Pain severity with activity and at rest                                                                                    | Rotterdam Healthy Aging Score pain sub-scale [30]                                                                                                                                                                                                                                                                                                                                                                                          |
| Chronic disease         | Comorbidity                                                                                                                | Chart review and self-report                                                                                                                                                                                                                                                                                                                                                                                                               |

UCLA= University of California, Los Angeles.

**Table S2.** Determinants of health evaluated in the CHANGE HIV cohort.

| <b>Determinants of health</b> | <b>Measure</b>                                                                                                                                                                   | <b>Measurement tool</b>                                                                                                                                                                                                                                                                                                                                              |
|-------------------------------|----------------------------------------------------------------------------------------------------------------------------------------------------------------------------------|----------------------------------------------------------------------------------------------------------------------------------------------------------------------------------------------------------------------------------------------------------------------------------------------------------------------------------------------------------------------|
| Behavioural                   | Coffee/Tea consumption<br>Food security<br>Sexual activity<br><br>Sexual satisfaction<br><br>Exercise<br>Smoking, Alcohol and other Substance use                                | Self-report- adapted from Liver cohort [31]<br><br>Food security survey adapted from OCS [32]<br>Questionnaire from OCS cohort for men [32]<br>Questionnaire from CHIWOS for women [33]<br>New sexual satisfaction questionnaire [34]<br>PROMIS sexual function and satisfaction tool [35]<br>Questionnaire adapted from OCS [32]<br>Questionnaire from CTN 222 [36] |
| Economic                      | Income and source<br>Work- current and past<br>Social security, pension                                                                                                          | Scale of Economic Self-Sufficiency [37]<br>Self-report adapted from OCS [32]<br>Self-report adapted from OCS [32]                                                                                                                                                                                                                                                    |
| Social                        | Community engagement<br>Resilience<br>Violence and abuse<br>Stigma<br>Isolation, social network                                                                                  | Meaningful Activity Participation Assessment [38]<br>Resilience Scale [39]<br>Modified WHO IPV Scale (CHIWOS) [33]<br>HIV stigma scale [40]<br>NIH Toolbox Adult Social Relationship Scales [41]                                                                                                                                                                     |
| Health and social services    | Primary/specialty care<br>Mental health support<br>Addictions counselling<br>Physiotherapy and Rehabilitation<br>AIDS service organizations<br>Long term care<br>Hospitalization | Self-report adapted from OCS and CTN222 [32, 36]                                                                                                                                                                                                                                                                                                                     |
| Physical environment          | Urban or rural<br>Transportation<br>Housing<br>Household members                                                                                                                 | Self-report                                                                                                                                                                                                                                                                                                                                                          |
| Personal                      | Age<br>Biologic sex<br>Education level<br>Literacy<br>Marital status<br>Children<br>Ethnicity                                                                                    | Self-report                                                                                                                                                                                                                                                                                                                                                          |

|  |                                                       |                                                                      |
|--|-------------------------------------------------------|----------------------------------------------------------------------|
|  | Year of immigration<br>Gender role<br>Gender identity | Bem Sex role inventory short form [42]<br>Sexual Identity Scale [43] |
|--|-------------------------------------------------------|----------------------------------------------------------------------|

OCS= Ontario HIV Treatment Network Cohort Study; CHIWOS= Canadian HIV Women's Sexual and Reproductive Health Cohort Study; CTN= Canadian Institutes of Health Research Canadian HIV Trials Network; NIH= National Institutes of Health.
